# Supplementary material
Source: PubMed Central journal article supplement (PMC8505437)
Supplement: 41416_2021_1510_MOESM4_ESM.pdf [file 41416_2021_1510_MOESM4_ESM.pdf]

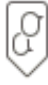

## Re: URGENT

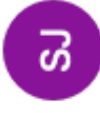

Skoko, John J

To: Neumann, Carola; Hopkins, Barbara (Pitt); hawoo@ewwha.ac.kr; Attaran, Shireen (Pitt); Wood, Laurel E; [+2 more](#)

Yesterday at 9:23 AM

I agree with the author change.  
Thanks,  
John

---

**From:** Neumann, Carola <[neumannc@upmc.edu](mailto:neumannc@upmc.edu)>

**Sent:** Wednesday, July 14, 2021 8:58 AM

**To:** Hopkins, Barbara Lee <[blh63@pitt.edu](mailto:blh63@pitt.edu)>; [hawoo@ewwha.ac.kr](mailto:hawoo@ewwha.ac.kr); Skoko, John J <[jskoko@pitt.edu](mailto:jskoko@pitt.edu)>; Attaran, Shireen <[SHA60@pitt.edu](mailto:SHA60@pitt.edu)>; Wood, Laurel E <[woodl@pitt.edu](mailto:woodl@pitt.edu)>; Wright, Megan Kathryn <[WRIGHT.MEGAN@medstudent.pitt.edu](mailto:WRIGHT.MEGAN@medstudent.pitt.edu)>; Adam Feinberg <[feinberg@andrew.cmu.edu](mailto:feinberg@andrew.cmu.edu)>

**Subject:** URGENT

Dear all,

Can you pls respond ASAP. BJC has asked for the following:

“It has come to our attention that your most recent author list differs from the one in your original submission. We find that the following author has been added since your initial submission: Alparslan Asan

Please request agreement from all authors including additions and deletions, these can be collected in the following way:

Email your co-authors with the change, and ask them to reply to your email confirming that they agree to these changes. Once you have collected these replies, please combine all of the co-authors’ email responses in one document and upload this file to your submission”.

Can you pls respond that you agree? Alp provided an experiment that was shown in the response letter (data from the use of the anti-PRDX1Y194 antibody) and not in the manuscript.

Thank you so much!

Carola

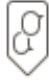

## Re: URGENT

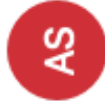

Attaran, Shireen <SHA60@pitt.edu>

To: Neumann, Carola

Yesterday at 12:52 PM

I agree with the author change.

Thanks,  
Shireen Attaran

On Jul 14, 2021, at 5:58 AM, Neumann, Carola <[neumannc@upmc.edu](mailto:neumannc@upmc.edu)> wrote:

Dear all,

Can you pls respond ASAP. BJC has asked for the following:

“It has come to our attention that your most recent author list differs from the one in your original submission. We find that the following author has been added since your initial submission: Alparslan Asan

Please request agreement from all authors including additions and deletions, these can be collected in the following way:

Email your co-authors with the change, and ask them to reply to your email confirming that they agree to these changes. Once you have collected these replies, please combine all of the co-authors’ email responses in one document and upload this file to your submission”.

Can you pls respond that you agree? Alp provided an experiment that was shown in the response letter (data from the use of the anti-PRDX1Y194 antibody) and not in the manuscript.

Thank you so much!

Carola

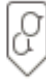

Re: URGENT

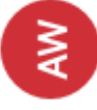

Adam W. Feinberg, Ph.D. <[feinberg@andrew.cmu.edu](mailto:feinberg@andrew.cmu.edu)>

To: Neumann, Carola; Hopkins, Barbara (Pitt); hawoo@ewwha.ac.kr; Skoko, John (Pitt); Attaran, Shireen (Pitt); [+2 more](#)

Yesterday at 3:34 PM

I agree with the author change.

Best,  
Adam

-----  
Adam W. Feinberg, Ph.D.  
Professor  
Regenerative Biomaterials and Therapeutics  
Dept. of Biomedical Engineering  
Dept. of Materials Science and Engineering  
Dept. of Mechanical Engineering (Courtesy)  
Carnegie Mellon University  
<http://regenerativebiomaterials.com>  
[feinberg@andrew.cmu.edu](mailto:feinberg@andrew.cmu.edu)  
Office: Scott Hall Room 4N109  
412-268-4897

On 7/14/21 8:58 AM, Neumann, Carola wrote:

Dear all,

Can you pls respond ASAP. BJC has asked for the following:

“It has come to our attention that your most recent author list differs from the one in your original submission. We find that the following author has been added since your initial submission: Alparslan Asan

Please request agreement from all authors including additions and deletions, these can be collected in the following way:

Email your co-authors with the change, and ask them to reply to your email confirming that they agree to these changes. Once you have collected these replies, please combine all of the co-authors’ email responses in one document and upload this file to your submission”.

Can you pls respond that you agree? Alp provided an experiment that was shown in the response letter (data from the use of the anti-PRDX1Y194 antibody) and not in the manuscript.

Thank you so much!

Carola

## Re:FW: URGENT

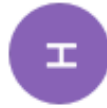

우현애 <hawoo@ewha.ac.kr>

To: Neumann, Carola

Today at 6:05 AM

You replied to this message on 7/15/21, 8:40 AM.

To protect your privacy, some pictures in this message were not downloaded.

Show Reply

Download pictures

Dear Carola,

I agree to add Alparslan Asan as an author.

If you need anything else, please let me know.  
Thank you.

Best wishes,  
Hyun Ae

Hyun Ae Woo, Ph.D.  
Associate Professor  
College of Pharmacy, Graduate School of Pharmaceutical Sciences,  
Ewha Womans University

----- 위본 메일 내용 -----

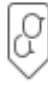

## Re: URGENT

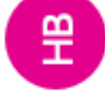

○ Hopkins, Barbara Lee <[blh63@pitt.edu](mailto:blh63@pitt.edu)>

To: ○ Adam Feinberg; ○ Neumann, Carola; ○ [hawoo@ewwha.ac.kr](mailto:hawoo@ewwha.ac.kr); ○ Skoko, John (Pitt); ○ Attaran, Shireen (Pitt); ○ Wood, Laurel E; [+1 more](#) ▾

Today at 10:47 AM

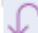

You replied to this message on 7/15/21, 10:57 AM.

Show Reply

I agree to the author change

Barbara Hopkins

---

**From:** Adam W. Feinberg, Ph.D. <[feinberg@andrew.cmu.edu](mailto:feinberg@andrew.cmu.edu)>

**Sent:** Wednesday, July 14, 2021 3:33 PM

**To:** Carola Neumann <[neumannc@upmc.edu](mailto:neumannc@upmc.edu)>; Hopkins, Barbara Lee <[blh63@pitt.edu](mailto:blh63@pitt.edu)>; [hawoo@ewwha.ac.kr](mailto:hawoo@ewwha.ac.kr) <[hawoo@ewwha.ac.kr](mailto:hawoo@ewwha.ac.kr)>; Skoko, John J <[jskoko@pitt.edu](mailto:jskoko@pitt.edu)>; Attaran, Shireen <[SHA60@pitt.edu](mailto:SHA60@pitt.edu)>; Wood, Laurel E <[woodl@pitt.edu](mailto:woodl@pitt.edu)>; Wright, Megan Kathryn <[WRIGHT.MEGAN@medstudent.pitt.edu](mailto:WRIGHT.MEGAN@medstudent.pitt.edu)>

**Subject:** Re: URGENT

I agree with the author change.

Best,  
Adam

---

Adam W. Feinberg, Ph.D.  
Professor

Regenerative Biomaterials and Therapeutics  
Dept. of Biomedical Engineering  
Dept. of Materials Science and Engineering  
Dept. of Mechanical Engineering (Courtesy)  
Carnegie Mellon University  
<http://regenerativebiomaterials.com>

[feinberg@andrew.cmu.edu](mailto:feinberg@andrew.cmu.edu)

Office: Scott Hall Room 4N109  
412-268-4897

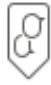

## Re: URGENT

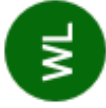

**Wood, Laurel E** <[woodl@pitt.edu](mailto:woodl@pitt.edu)>

To: Hopkins, Barbara (Pitt); hawoo@ewwha.ac.kr; Skoko, John (Pitt); Attaran, Shireen (Pitt); Wright, Megan Kathryn; [+2 more](#)

Yesterday at 9:08 AM

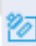

Business General

[Learn more](#)

I agree with the author change.

Thanks!

Laurel

Sent via the Samsung Galaxy S21 5G, an AT&T 5G smartphone  
Get [Outlook for Android](#)

---

**From:** Neumann, Carola <[neumannc@upmc.edu](mailto:neumannc@upmc.edu)>

**Sent:** Wednesday, July 14, 2021 8:58:02 AM

**To:** Hopkins, Barbara Lee <[blh63@pitt.edu](mailto:blh63@pitt.edu)>; [hawoo@ewwha.ac.kr](mailto:hawoo@ewwha.ac.kr) <[hawoo@ewwha.ac.kr](mailto:hawoo@ewwha.ac.kr)>; Skoko, John J <[jskoko@pitt.edu](mailto:jskoko@pitt.edu)>; Attaran, Shireen <[SHA60@pitt.edu](mailto:SHA60@pitt.edu)>; Wood, Laurel E <[woodl@pitt.edu](mailto:woodl@pitt.edu)>; Wright, Megan Kathryn <[WRIGHT.MEGAN@medstudent.pitt.edu](mailto:WRIGHT.MEGAN@medstudent.pitt.edu)>; Adam Feinberg <[feinberg@andrew.cmu.edu](mailto:feinberg@andrew.cmu.edu)>

**Subject:** URGENT

Dear all,

Can you pls respond ASAP. BJC has asked for the following:

“It has come to our attention that your most recent author list differs from the one in your original submission. We find that the following author has been added since your initial submission: Alparslan Asan

Please request agreement from all authors including additions and deletions, these can be collected in the following way:

Email your co-authors with the change, and ask them to reply to your email confirming that they agree to these changes. Once you have collected these replies, please combine all of the co-authors’ email responses in one document and upload this file to your submission”.

Can you pls respond that you agree? Alp provided an experiment that was shown in the response letter (data from the use of the anti-PRDX1Y194 antibody) and not in the manuscript.

Thank you so much!

Carola
